# Supplementary material
Source: Elsevier journal article supplement (https://www.sciencedirect.com/science/article/pii/S1132055915000368)
Supplement: mmc1 [file S1132055915000368:mmc1.docx]

Supplementary Table S1

*Ego Network Survey Questions and Response Options*

|  | **Question** | | **Options** |
| --- | --- | --- | --- |
| **Name generator**a | | | |
|  | You will be asked who you spend time with and who you turn to for different kinds of help. You can type in just their first names or their initials if you wish. Think carefully of the people you feel have been important to you for help or for spending time with. So think now about the important people in your life. | |  |
| **Ego attributes** | | | |
| Age | What is your age? | |  |
| Gender | What is your gender? | | 1, Male | 2, Female |
| **Alter attributes** | | | |
| Age group | What is **<alter>**'s age group? | | 1, Young child (under 10) | 2, Youth | 3, Adult | 4, Elder |
| Gender | Is **<alter>** male or female? | | 1, Male | 2, Female |
| **Ego-Alter relationship**b | | | |
| Love relationship | Does **<alter>** let you know you are okay; loves you, tells you when he/she likes your ideas or the things that you do? Like tell you that you are a good person, have done something very well, or that you are clever or funny? | 1, Yes | 0, No | |
| Private relationship | Would you talk to **<alter>** about something that was very personal or private? For instance, if you had something on your mind that was worrying you or making you feel down would you talk to **<alter>**? | 1, Yes | 0, No | |
| Relationship role | Which best describes **<alter>**'s relationship to you? | 1, Sister or brother | 2, Parent | 3, Child | 4, Spouse/Boyfriend/Girlfriend | 5, Friend | 6, Someone I know in the community | 7, Co-worker | 8, Other family member | 9, Otherc | |
| Relationship satisfaction | Thinking about this relationship, how satisfied are you with your relationship with **<alter>**? | 1, Dissatisfied | 2, Neutral | 3, Satisfied | |
| Relationship qualityd | Here is a list of characteristics or qualities that makes people likable. Which one(s) do you like most about **<alter>**? | 1, We help each other out | 2, We share or tell personal things with each other | 3, Is careful about my feelings | 4, I'm able to depend on him/her | 5, She/He's loyal and sticks up for me | 6, Stays friendly even when we get mad at each other | 7, Likes me just as I am | 8, I look up to him/her | 9, Like doing things together | 10, We believe the same things are important | 11, We're interested in or like the same things | 12, Understanding about how each other feels about things | 13, Otherc | |
| **Alter-Alter relationship**e | | | |
| Know relationship | Do **<alter 1>** and **<alter 2>**know each other? | | 1, Yes | 0, No |

*Note.* aUp to 8 nominations on first pass and 5 on second;bOne set of questions for each alter; <altter> was replaced with actual alter’s nickname or initials; cText entered by participant for Other; dMultiple answers allowed; eOne question for each Alter-Alter pair.

Supplementary Table S2

*Descriptive Statistics for Ego Network Variables (n=57)*

| **Variable** | | **Description** | | **Mean ± sd** | **Range** | **Skew** |
| --- | --- | --- | --- | --- | --- | --- |
| **Network structure (n=57)** | | | | | | |
| Network size | | Nb of alters + 1 | | 5.93 ± 2.62 | (3,14) | 0.56 |
| Network density | | Actual Nb of ties / possible Nb of ties | | 0.98 ± 0.07 | (0.69,1) | -2.86 |
| Constraint | | Room you have to negotiate or exploit potential structural holes in network (rev. coded) | | -0.75 ± 0.28 | (-1.1,-0.26) | -0.17 |
| Effective size | | Nb of people ego is connected to, minus the redundancy in the network (rev. coded) | | -1.24 ± 0.76 | (-5.3,-1) | -3.74 |
| Efficiency | | Effective size / actual size (rev. coded) | | -0.03 ± 0.08 | (-0.34,-0) | -2.81 |
| Ego network betweenness | | Number of times ego is on the shortest path between alters (rev. coded) | | | -0.45 ± 2.05 |  | | --- | --- | | | (-15,-0) |  | | --- | --- | | -6.28 |
| Mean closeness | | Mean closeness centrality of alters | | 0.96 ± 0.14 | (0,1) | -5.75 |
| Mean betweenness | | Mean betweenness centrality of alters (rev. coded) | | -0.10 ± 0.30 | (-1.4,-0) | -2.92 |
| Max closeness | | Maximum closeness centrality of alters | | 0.98 ± 0.13 | (0,1) | -6.97 |
| Max betweenness | | Maximum betweenness centrality of alters (rev. coded) | | -0.34 ± 1.24 | (-8.2,-0) | -5.01 |
| Closeness centralization | | Global closeness index for alters | | 0.12 ± 0.40 | (0,2) | 3.40 |
| Betweenness centralization | | Global betweenness index for alters (rev. coded) | | -2.07 ± 8.29 | (-55,-0) | -5.24 |
| **Network composition (n=57)** | | | | | | |
| Degree adult | Nb of alters who are adults | | 2.53 ± 1.35 | | (0,5) | 0.03 |
| Degree Elder | Nb of alters who are Elders | | 0.53 ± 0.78 | | (0,3) | 1.27 |
| Degree youth | Nb of alters who are youth | | 1.70 ± 2.18 | | (0,11) | 2.03 |
| Degree love | Nb of alters with a love relation | | 4.88 ± 2.52 | | (2,11) | 0.36 |
| Degree love adult | Nb of alters with a love relation who are adults | | 2.53 ± 1.35 | | (0,5) | 0.03 |
| Degree love Elder | Nb of alters with a love relation who are Elders | | 0.53 ± 0.78 | | (0,3) | 1.27 |
| Degree love youth | Nb of alters with a love relation who are youth | | 1.65 ± 2.03 | | (0,9) | 1.69 |
| Degree private | Nb of alters with a private relation | | 4.51 ± 2.54 | | (0,13) | 0.80 |
| Degree private adult | Nb of alters with a private relation who are adults | | 2.26 ± 1.38 | | (0,5) | 0.05 |
| Degree private Elder | Nb of alters with a private relation who are Elders | | 0.49 ± 0.76 | | (0,3) | 1.39 |
| Degree private youth | Nb of alters with a private relation who are youth | | 1.61 ± 2.11 | | (0,11) | 2.26 |
| Degree non nuclear family | Nb of alters who are not parent or sibling | | 2.19 ± 2.38 | | (0,11) | 1.49 |
| Degree adult non nuclear family | Nb of alters who are adults or Elders, but not parent or sibling | | 0.91 ± 1.20 | | (0,4) | 1.11 |
| Love density | Degree love / Nb of alters | | 0.99 ± 0.03 | | (0.83,1) | -5.07 |
| Private density | Degree private / Nb of alters | | 0.93 ± 0.19 | | (0,1) | -3.40 |
| Adult density | Degree adult / Nb of alters | | 0.59 ± 0.29 | | (0,1) | -0.09 |
| Elder density | Degree Elder / Nb of alters | | 0.12 ± 0.20 | | (0,1) | 2.15 |
| Adult boundary density | Actual Nb of youth to adult pairings / Nb of possible youth to adult pairings | | 0.92 ± 0.26 | | (0,1) | -3.21 |
| Elder boundary density | Actual Nb of youth to Elder pairings / Nb of possible youth to Elder pairings | | 0.35 ± 0.47 | | (0,1) | 0.62 |
| Gender homophily | Extend to which ego is connected to alters of the same gender | | -0.30 ± 0.47 | | (-1,1) | 0.11 |
| Age group homophily | Extend to which ego is connected to alters of the same age group | | 0.46 ± 0.55 | | (-1,1) | -0.84 |
| Gender heterogeneity | Extend to which actors are connected to alters of the same gender | | 0.47 ± 0.27 | | (0,0.84) | -0.65 |
| Age group heterogeneity | Extend to which actors are connected to alters of the same age group | | 0.73 ± 0.18 | | (0,0.94) | -2.43 |
| We help each other out | Nb of alters providing this type of support | | 4.14 ± 2.52 | | (0,9) | 0.16 |
| We share or tell personal things with each other | Nb of alters providing this type of support | | 2.60 ± 2.24 | | (0,8) | 0.77 |
| Is careful about my feelings | Nb of alters providing this type of support | | 3.14 ± 2.72 | | (0,8) | 0.65 |
| I’m able to depend on him/her | Nb of alters providing this type of support | | 3.44 ± 2.56 | | (0,8) | 0.50 |
| She/He’s loyal and sticks up for me | Nb of alters providing this type of support | | 3.21 ± 2.53 | | (0,8) | 0.51 |
| Stays friendly even when we get mad at each other | Nb of alters providing this type of support | | 2.81 ± 2.53 | | (0,8) | 0.69 |
| Likes me just as I am | Nb of alters providing this type of support | | 3.39 ± 2.76 | | (0,8) | 0.55 |
| I look up to him/her | Nb of alters providing this type of support | | 3.23 ± 2.52 | | (0,8) | 0.54 |
| Like doing things together | Nb of alters providing this type of support | | 3.23 ± 2.59 | | (0,8) | 0.62 |
| We believe the same things are important | Nb of alters providing this type of support | | 2.51 ± 2.49 | | (0,8) | 0.77 |
| We’re interested in or like the same things | Nb of alters providing this type of support | | 2.21 ± 2.23 | | (0,8) | 0.97 |
| Understanding about how each other feels about things | Nb of alters providing this type of support | | 2.40 ± 2.31 | | (0,8) | 1.03 |
| Sister/brother | Nb of alters with this role | | 1.30 ± 1.40 | | (0,6) | 1.07 |
| Parent | Nb of alters with this role | | 1.44 ± 1.00 | | (0,5) | 0.33 |
| Child | Nb of alters with this role | | 0.12 ± 0.50 | | (0,3) | 4.50 |
| Spouse/Boyfriend/Girlfriend | Nb of alters with this role | | 0.11 ± 0.31 | | (0,1) | 2.57 |
| Friend | Nb of alters with this role | | 1.09 ± 1.64 | | (0,8) | 2.38 |
| Someone I know in the community | Nb of alters with this role | | 0.05 ± 0.29 | | (0,2) | 5.83 |
| Other family | Nb of alters with this role | | 0.79 ± 1.26 | | (0,5) | 1.69 |
| Other role | Nb of alters with this role | | 0.04 ± 0.19 | | (0,1) | 5.05 |
| Dissatisfied | Nb of relationships ego is dissatisfied with | | 0.25 ± 1.15 | | (0,7) | 4.93 |
| Neutral | Nb of relationships ego has neutral satisfaction with | | 1.19 ± 2.07 | | (0,8) | 1.82 |
| Satisfied | Nb of relationships ego is satisfied with | | 3.49 ± 2.57 | | (0,8) | 0.49 |
| Overall tie satisfaction | Sum of satisfaction scores (1-3), over all ties | | 13.11 ± 6.67 | | (4,24) | 0.35 |
| Overall tie satisfaction density | Overall tie satisfaction / Max possible overall tie satisfaction | | 0.91 ± 0.15 | | (0.5,1) | -1.23 |

*Note:* Mean and max closeness and closeness centralization are indicators of ego closeness in global network; Ego network betweenness, mean and max betweenness and betweenness centralization are indicators of ego betweenness in global network.
